# Supplementary material for: Strength Training to Prevent Falls in Older Adults: A Systematic Review with Meta-Analysis of Randomized Controlled Trials
Source: MDPI journal article supplement (doi:10.3390/jcm10143184), 2021-07-20
Supplement: s1 [file s1]

**Table S1.** Results of individual studies (extended version).

| Davis, <i>et al.</i> [1], 2011                                  |                                                 |                 |                                                |                 |                               |                |
|-----------------------------------------------------------------|-------------------------------------------------|-----------------|------------------------------------------------|-----------------|-------------------------------|----------------|
| Primary outcomes                                                | Once-weekly ST                                  |                 | Twice-weekly ST                                |                 | Twice-weekly balance and tone |                |
| Total number of falls                                           | 30                                              |                 | 32 <sup>a</sup>                                |                 | 38                            |                |
| Falls rate per person                                           | 0.56                                            |                 | 0.62                                           |                 | 0.78                          |                |
| Incidence Rate Ratio (falls)                                    | -27% (0.73; 95%IC = 0.44 – 1.23) <sup>ns</sup>  |                 | -12% (0.88; 95%IC = 0.67 – 1.16) <sup>ns</sup> |                 | Reference                     |                |
| Secondary outcomes                                              |                                                 |                 |                                                |                 |                               |                |
| Cost-effectiveness #1 (SF-6D and cost data in \$ USD)           | -26% (95%IC = -25% – -27%)                      |                 | -10%; (95%IC = -5% – -14%)                     |                 | Reference                     |                |
| Cost-effectiveness #2 (EQ-5D and cost data in \$ USD)           | -25% (95%IC = -23% – -27%)                      |                 | -13% (95%IC = -9% – -18%)                      |                 | Reference                     |                |
|                                                                 | ES                                              | (95% CI)        | ES                                             | (95% CI)        | ES                            | (95% CI)       |
| Change in whole-brain volume from baseline (%)                  | -0.45                                           | (-0.68 – -0.22) | -0.50                                          | (-0.74 – -0.27) | 0.00                          | (-0.23 – 0.23) |
| Stroop test (s)                                                 | -0.37                                           | (-0.76 – 0.03)  | -0.27                                          | (-0.66 – 0.13)  | -0.01                         | (-0.42 – 0.40) |
| Trail Making Test (s)                                           | -0.27                                           | (-0.67 – 0.12)  | -0.31                                          | (-0.71 – 0.09)  | -0.33                         | (-0.74 – 0.09) |
| Verbal digit span test (score where lower difference is better) | -0.05                                           | (-0.44 – 0.34)  | 0.18                                           | (-0.22 – 0.57)  | 0.36                          | (-0.06 – 0.77) |
| Gait speed (m/s)                                                | 1.00                                            | (0.59 – 1.41)   | 1.00                                           | (0.58 – 1.42)   | 1.00                          | (0.56 – 1.44)  |
| 1-RM (N) <sup>b</sup>                                           | 0.77                                            | (0.23 – 1.31)   | 0.99                                           | (0.43 – 1.54)   | 0.23                          | (-0.32 – 0.78) |
| Peak muscle power (W) <sup>c</sup>                              | -0.29                                           | (-0.82 – 0.23)  | 0.46                                           | (-0.07 – 1.00)  | -0.51                         | (-1.06 – 0.05) |
| Liang, <i>et al.</i> [2], 2020                                  |                                                 |                 |                                                |                 |                               |                |
| Primary outcomes                                                | ST Group                                        |                 | ST + Balance Group                             |                 |                               |                |
| Fallers                                                         | 23% (7/30)                                      |                 | 13% (4/30)                                     |                 |                               |                |
| Risk ratio (RR)                                                 | + 11% (0.89; 95%IC = 0.69 – 1.13) <sup>ns</sup> |                 | Reference                                      |                 |                               |                |
| Secondary outcomes                                              |                                                 |                 |                                                |                 |                               |                |
|                                                                 | ES                                              | (95% CI)        | ES                                             | (95% CI)        |                               |                |
| MRMI from baseline (score)                                      | 0.22                                            | (-0.05 – 0.50)  | 0.51                                           | (0.22 – 0.80)   |                               |                |

|                                            |                                   |                 |                                  |                 |                    |                 |
|--------------------------------------------|-----------------------------------|-----------------|----------------------------------|-----------------|--------------------|-----------------|
| Barthel Index score (points)               | 0.50                              | (-0.01 – 1.02)  | 0.69                             | (0.16 – 1.21)   |                    |                 |
| Gait speed (m/s)                           | 0.31                              | (-0.19 – 0.82)  | 0.71                             | (0.19 – 1.23)   |                    |                 |
| Handgrip strength (kg)                     | 0.23                              | (-0.28 – 0.73)  | 0.73                             | (0.21 – 1.25)   |                    |                 |
| SPPB (score)                               | 0.47                              | (-0.04 – 0.98)  | 1.17                             | (0.62 – 1.71)   |                    |                 |
| Berg balance (score)                       | 0.42                              | (-0.10 – 0.93)  | 0.72                             | (0.20 – 1.24)   |                    |                 |
| TUG (score)                                | -0.27                             | (-0.78 – 0.24)  | -0.54                            | (-1.05 – -0.02) |                    |                 |
| Liu-Ambrose, et al. [3], 2004              |                                   |                 |                                  |                 |                    |                 |
| Primary outcomes                           | ST Group                          |                 | Stretching Group                 |                 | Agility Group      |                 |
| Total number of falls                      | 18 (one subject fell seven times) |                 | 10                               |                 | 11                 |                 |
| Frequent fallers <sup>d</sup>              | 9% (3/32)                         |                 | 6% (2/32)                        |                 | 15% (5/34)         |                 |
| PPA fall-risk scores                       | -57%                              |                 | -20%                             |                 | -48%               |                 |
|                                            | ES                                | (95% CI)        | ES                               | (95% CI)        | ES                 | (95% CI)        |
| Fall-risk score (points)                   | -1.39                             | (-1.94 – -0.84) | -0.39                            | (-0.89 – 0.10)  | -0.78              | (-1.78 – -0.28) |
| Secondary outcomes                         |                                   |                 |                                  |                 |                    |                 |
| Postural sway (mm)                         | -0.80                             | (-1.31 – -0.29) | 0.00                             | (-0.49 – 0.49)  | -0.74              | (-1.24 – -0.25) |
| Quadriceps strength (kg)                   | 0.21                              | (-0.28 – 0.71)  | 0.21                             | (-0.29 – 0.70)  | 0.03               | (-0.45 – 0.50)  |
| Hand reaction time (ms)                    | -1.25                             | (-1.78 – -0.71) | -0.51                            | (-1.01 – -0.02) | -0.74              | (-1.23 – -0.24) |
| Proprioception (deg)                       | -0.41                             | (-0.90 – 0.09)  | 0.09                             | (-0.40 – 0.58)  | -0.25              | (-0.73 – 0.23)  |
| Edge contrast (dB)                         | 0.65                              | (0.15 – 1.15)   | 0.35                             | (-0.14 – 0.84)  | 0.56               | (0.07 – 1.04)   |
| Dorsiflexion strength (kg)                 | 0.51                              | (0.01 – 1.01)   | 0.34                             | (-0.16 – 0.83)  | 0.62               | (0.13 – 1.10)   |
| Foot reaction time (ms)                    | -0.67                             | (-1.18 – -0.17) | -0.31                            | (-0.80 – 0.19)  | -0.39              | (-0.87 – 0.09)  |
| CB&M scale (out of 85 points)              | 0.30                              | (-0.19 – 0.80)  | 0.26                             | (-0.23 – 0.75)  | 0.53               | (0.05 – 1.01)   |
| Tuunainen, et al. [4], 2013                |                                   |                 |                                  |                 |                    |                 |
| Primary outcomes                           | ST Group                          |                 | Self-administered training Group |                 | ST + Balance Group |                 |
| Fallers (follow up)                        | 7                                 |                 | 14                               |                 | 6                  |                 |
| Frequent fallers <sup>e</sup> (follow up)  | 6                                 |                 | 9                                |                 | 5                  |                 |
| Total number of falls (range in follow up) | 42 (1–21)                         |                 | 64 (1–30)                        |                 | 24 (1-8)           |                 |
| Mean risk of fall                          | 0.47 ± 0.52                       |                 | 0.73 ± 0.37                      |                 | 0.42 ± 0.49        |                 |
| Secondary outcomes                         | ES                                | (95% CI)        | ES                               | (95% CI)        | ES                 | (95% CI)        |
| 15D HRQoL (score)                          | -1.18                             | (-1.91 – -0.45) | -0.42                            | (-1.07 – 0.23)  | -0.55              | (-1.26 – 0.16)  |
| Woo, et al. [5], 2007                      |                                   |                 |                                  |                 |                    |                 |

| Primary outcomes                                       | ST Group              |                       | Tai Chi Group         |                       | Control Group         |                      |
|--------------------------------------------------------|-----------------------|-----------------------|-----------------------|-----------------------|-----------------------|----------------------|
|                                                        | 24 (24/60)            |                       | 15 (15/60)            |                       | 31 (31/60)            |                      |
| Total number of falls                                  | Female                | Male                  | Female                | Male                  | Female                | Male                 |
| Secondary outcomes                                     | ES (95% CI)           | ES (95% CI)          |
| Percentage change of BMD (hip) from baseline           | 0.02 (-0.25 – 0.29)   | -0.44 (-0.73 – -0.15) | 0.02 (-0.26 – 0.29)   | -0.18 (-0.45 – 0.09)  | -0.52 (-0.80 – -0.23) | 0.00 (-0.28 – 0.27)  |
| Percentage change of BMD (spine) from baseline         | 0.57 (0.28 – 0.86)    | 0.42 (0.14 – 0.71)    | 0.03 (-0.25 – 0.31)   | 0.46 (0.18 – 0.75)    | 0.29 (0.01 – 0.56)    | 0.18 (-0.10 – 0.46)  |
| Handgrip strength (dominant hand; kg) from baseline    | 0.33 (0.05 – 0.61)    | 0.43 (0.14 – 0.71)    | 0.38 (0.09 – 0.67)    | 0.58 (0.28 – 0.87)    | 0.25 (-0.02 – 0.53)   | 0.69 (0.39 – 1.00)   |
| Mean of strength of both quadriceps (kg) from baseline | 0.33 (0.05 – 0.60)    | 0.30 (0.01 – 0.58)    | 0.34 (0.06 – 0.63)    | 0.25 (-0.03 – 0.52)   | 0.45 (0.17 – 0.73)    | 0.31 (0.03 – 0.59)   |
| Balance (By Smart Balance; 1-100)                      | 0.61 (0.31 – 0.90)    | 0.49 (0.20 – 0.78)    | 0.29 (0.01 – 0.58)    | 0.28 (0.01 – 0.56)    | 0.47 (0.19 – 0.76)    | 0.20 (-0.08 – 0.48)  |
| Mean of both leg single stance (s)                     | 0.40 (0.12 – 0.68)    | 0.49 (0.19 – 0.78)    | 0.17 (-0.11 – 0.45)   | 0.48 (0.19 – 0.76)    | 0.32 (0.05 – 0.60)    | 0.46 (0.17 – 0.75)   |
| Single stance in dominant leg (s)                      | 0.20 (-0.08 – 0.48)   | 0.30 (0.01 – 0.58)    | 0.08 (-0.20 – 0.36)   | 0.40 (0.11 – 0.67)    | 0.30 (0.02 – 0.58)    | 0.45 (0.16 – 0.74)   |
| Body flexibility (hamstring; cm)                       | -0.37 (-0.65 – -0.09) | -0.28 (-0.56 – 0.00)  | -0.40 (-0.69 – -0.11) | -0.41 (-0.69 – -0.13) | -0.31 (-0.58 – -0.03) | -0.09 (-0.36 – 0.19) |

\* =  $P < 0.05$ ; <sup>ns</sup> = non-significant; <sup>a</sup> = 38 and 32 excluding outlier with falls rate per person of 0.73 before excluded outlier; <sup>b</sup> = For this analysis, once-weekly ST at PRE (n = 30) and POST (n = 27), Twice-weekly ST at PRE (n = 31) and POST (n = 25); <sup>c</sup> = For this analysis, once-weekly ST at PRE (n = 29) and POST (n = 27), twice-weekly ST at PRE (n = 30) and POST (n = 25); <sup>d</sup> = who had more than one fall during the intervention period; USD = US dollars (the conversion rate to USD at 2008 purchasing power parity is \$ 1 Canadian Dollar = \$ 0.77 USD); MRMI = modified Rivermead Mobility Index; SPPB = short physical performance test; TUG = timed up to go test; PPA = Physiological Profile Assessment; CB&M scale = Community Balance and Mobility Scale score; 15D HRQoL = health related quality of life with 15 dimensions; BMD = bone mineral density.

---

## References

1. Davis, J.C.; Marra, C.A.; Robertson, M.C.; Khan, K.M.; Najafzadeh, M.; Ashe, M.C.; Liu-Ambrose, T. Economic evaluation of dose-response resistance training in older women: a cost-effectiveness and cost-utility analysis. *Osteoporosis International* **2011**, *22*, 1355-1366, doi:10.1007/s00198-010-1356-5.
2. Liang, Y.; Wang, R.; Jiang, J.; Tan, L.; Yang, M. A randomized controlled trial of resistance and balance exercise for sarcopenic patients aged 80-99 years. *Scientific reports* **2020**, *10*, 18756, doi:10.1038/s41598-020-75872-2.
3. Liu-Ambrose, T.; Khan, K.M.; Eng, J.J.; Janssen, P.A.; Lord, S.R.; McKay, H.A. Resistance and Agility Training Reduce Fall Risk in Women Aged 75 to 85 with Low Bone Mass: A 6-Month Randomized, Controlled Trial. *Journal of the American Geriatrics Society* **2004**, *52*, 657-665, doi:10.1111/j.1532-5415.2004.52200.x.
4. Tuunainen, E.; Rasku, J.; Jäntti, P.; Moisio-Vilenius, P.; Mäkinen, E.; Toppila, E.; Pyykkö, I. Postural stability and quality of life after guided and self-training among older adults residing in an institutional setting. *Clinical Interventions in Aging* **2013**, *8*, 1237-1246, doi:10.2147/CIA.S47690.
5. Woo, J.; Hong, A.; Lau, E.; Lynn, H. A randomised controlled trial of Tai Chi and resistance exercise on bone health, muscle strength and balance in community-living elderly people. *Age and ageing* **2007**, *36*, 262 - 268, doi:10.1093/ageing/afm005.
